# Supplementary material
Source: ML conference proceedings conference paper supplement (https://proceedings.mlr.press/v32/chenf14.html)
Supplement: Supplementary file 1 [file chenf14-supp.zip]

---

## Supplemental Material

### Topic Modeling using Topics from Many Domains, Lifelong Learning and Big Data

---

**Zhiyuan Chen**

Department of Computer Science, University of Illinois at Chicago

CZYUANACM@GMAIL.COM

**Bing Liu**

Department of Computer Science, University of Illinois at Chicago

LIUB@CS.UIC.EDU

The below table lists 50 domain names used in the paper.

|                |                     |              |                 |                 |
|----------------|---------------------|--------------|-----------------|-----------------|
| Alarm Clock    | Computer            | Kindle       | Network Adapter | Telephone       |
| Amplifier      | DVD Player          | Lamp         | Printer         | TV              |
| Battery        | Fan                 | Laptop       | Projector       | Vacuum          |
| Blu-Ray Player | GPS                 | Media Player | Radar Detector  | Video Player    |
| Cable Modem    | Graphics Card       | Memory Card  | Remote Control  | Video Recorder  |
| Camcorder      | Hard Drive          | Microphone   | Rice Cooker     | Voice Recorder  |
| Camera         | Headphone           | Microwave    | Scanner         | Watch           |
| Car Stereo     | Home Theater System | Monitor      | Speaker         | Webcam          |
| CD Player      | Iron                | Mouse        | Subwoofer       | Wireless Router |
| Cell Phone     | Keyboard            | MP3Player    | Tablet          | Xbox            |
